# Supplementary material for: Dimethyl yellow-based colorimetric chemosensors for “naked eye” detection of Cr3+ in aqueous media via test papers
Source: Royal Society of Chemistry journal article supplement (doi:10.1039/c5ra22127g), 2016-01-01

## Supporting Information for

# Dimethyl yellow-based colorimetric chemosensors for “naked eye” detection of Cr<sup>3+</sup> in aqueous media *via* test papers

De-Hui Wang,<sup>‡,a\*</sup> Yuan Zhang,<sup>‡,b</sup> Ran Sun<sup>a</sup> and De-Zhi Zhao<sup>a\*</sup>

<sup>a</sup> College of chemistry, chemical engineering and environmental engineering,  
Liaoning Shihua University, Fushun, 113001, China

<sup>b</sup> Liaoning Institute for Food Control, Shenyang, 110015, China.

E-mail: [dhuiwang@aliyun.com](mailto:dhuiwang@aliyun.com)

<sup>‡</sup> D. Wang and Y. Zhang contributed equally to this work.

## Table of Contents

1. **Figure S1** Selectivity and competition of **DYN1** for Cr<sup>3+</sup>
2. **Figure S2** The pH-dependent of **DYN1** and **DYN1+Cr<sup>3+</sup>**
3. **Figure S3** Calculations for detection limit of **DYN1** with Cr<sup>3+</sup>
4. **Figure S4** Selectivity and competition of **DYN3** for Cr<sup>3+</sup>
5. **Figure S5** The pH-dependent of **DYN3** and **DYN3+Cr<sup>3+</sup>**
6. **Figure S6** Calculations for detection limit of **DYN3** with Cr<sup>3+</sup>
7. **Figure S7** Selectivity and competition of **DYN2** for Cr<sup>3+</sup>
8. **Figure S8** The pH-dependent of **DYN2** and **DYN2+Cr<sup>3+</sup>**
9. **Figure S9** Calculations for detection limit of **DYN2** with Cr<sup>3+</sup>
10. **Figure S10** <sup>1</sup>H-NMR spectra of **DYN1**
11. **Figure S11** <sup>1</sup>H-NMR spectra of **DYN3**
12. **Figure S12** <sup>1</sup>H-NMR spectra of **DYN2**
13. **Figure S13** <sup>1</sup>H-NMR spectra of **DYN4**
14. **Figure S14** <sup>1</sup>H-NMR spectra of **1**
15. **Figure S15** <sup>1</sup>H-NMR spectra of **2**
16. **Figure S16** <sup>1</sup>H-NMR spectra of **3**
17. **Figure S17** Contour plots of the HOMO and LUMO for **DYN1-4**
18. **Figure S18** ESI-TOF spectra of **DYN1+Cr<sup>3+</sup>**
19. **Figure S19** ICP-AES spectra of sewage sample

1. **Figure S1** UV-Vis spectra of **DYN1** ( $2 \times 10^{-5}$  M) in  $\text{CH}_3\text{CN}:\text{H}_2\text{O}$  (1:1, v/v, containing 0.01 M HEPES, pH=7.21) upon titration with 3.0 equiv. of perchlorate salts of metals. The red bars represent the absorbance of **DYN1** in the presence of 2 equiv. of cations of interest, respectively. The green bars represent the absorbance that occur upon the subsequent addition of 2 equiv. of  $\text{Cr}^{3+}$  to the above mentioned solutions, respectively. The absorbance measurements were recorded at 516 nm.

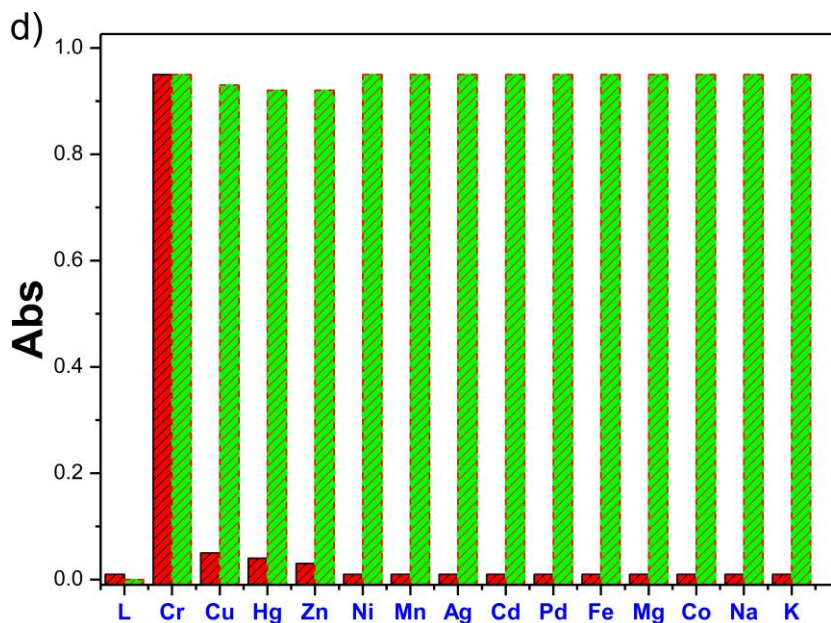

2. **Figure S2** The pH-dependent absorbance response of **DYN1** (20  $\mu\text{M}$ ) and **DYN1**+ $\text{Cr}^{3+}$  in  $\text{CH}_3\text{CN}/\text{H}_2\text{O}$  (1:1, v/v). The absorbance measurements were recorded at 516 nm.

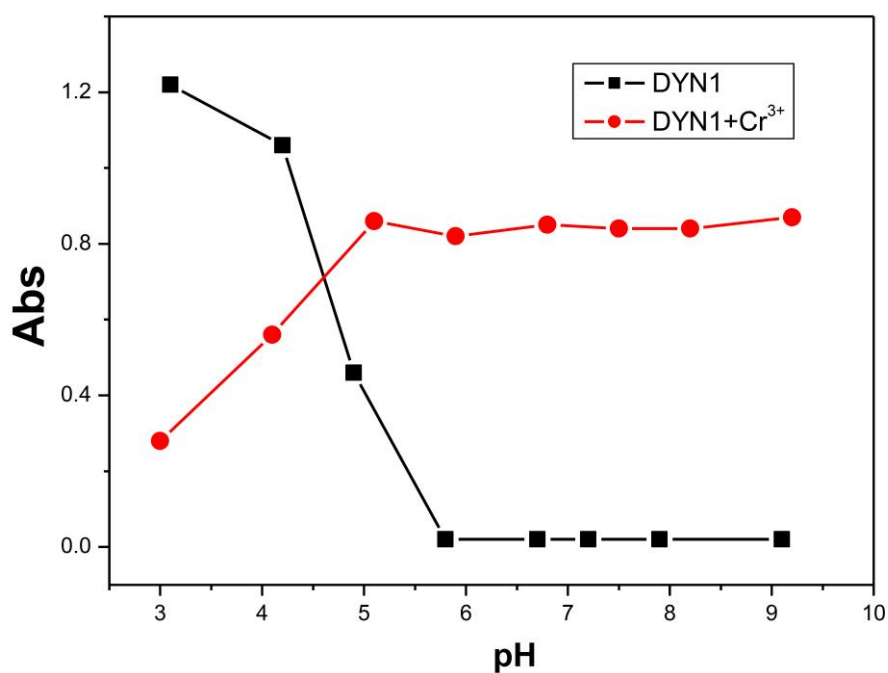

3. **Figure S3** Calculations for detection limit of **DYN1** with  $\text{Cr}^{3+}$ . The absorbance measurements were recorded at 516 nm.

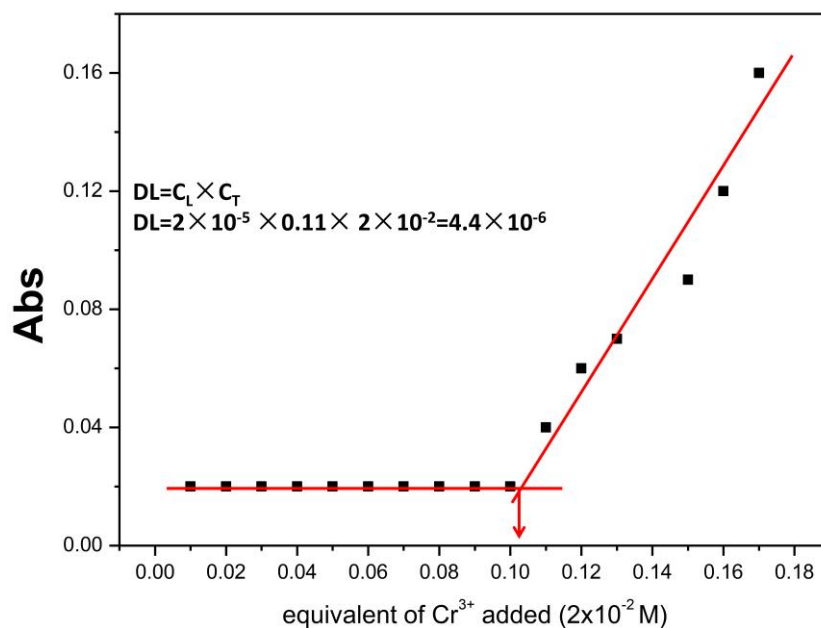

4. **Figure S4** UV-Vis spectra of **DYN3** ( $2 \times 10^{-5}$  M) in  $\text{CH}_3\text{CN}:\text{H}_2\text{O}$  (1:1, v/v, containing 0.01 M HEPES, pH=7.21) upon titration with 3.0 equiv. of perchlorate salts of metals. The red bars represent the absorbance of **DYN3** in the presence of 3 equiv. of cations of interest, respectively. The green bars represent the absorbance that occur upon the subsequent addition of 3 equiv. of  $\text{Cr}^{3+}$  to the above mentioned solutions, respectively. The absorbance measurements were recorded at 526 nm.

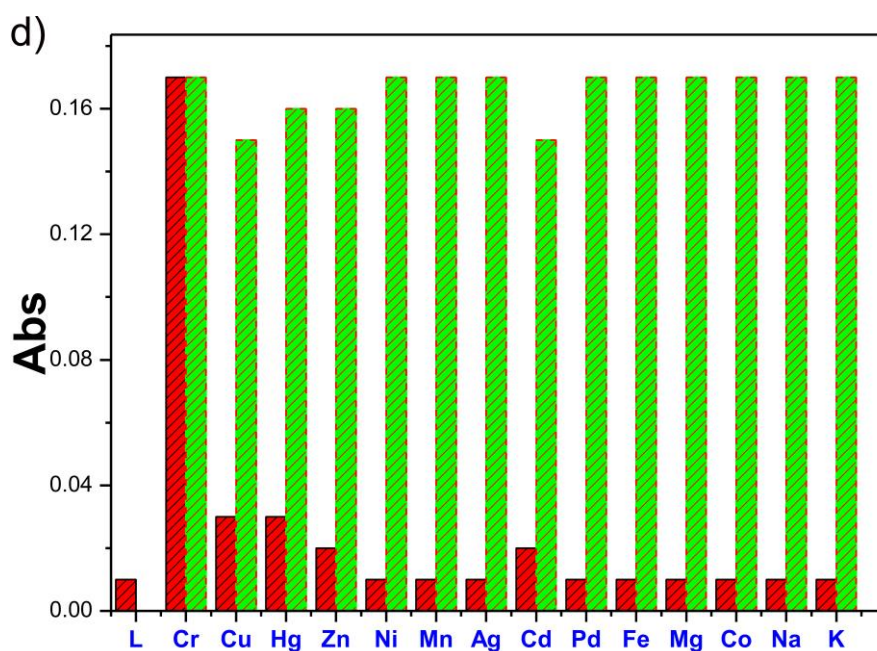

5. **Figure S5** The pH-dependent absorbance response of **DYN3** (20  $\mu\text{M}$ ) and **DYN3**+ $\text{Cr}^{3+}$  in  $\text{CH}_3\text{CN}/\text{H}_2\text{O}$  (1:1, v/v). The absorbance measurements were recorded at 526 nm.

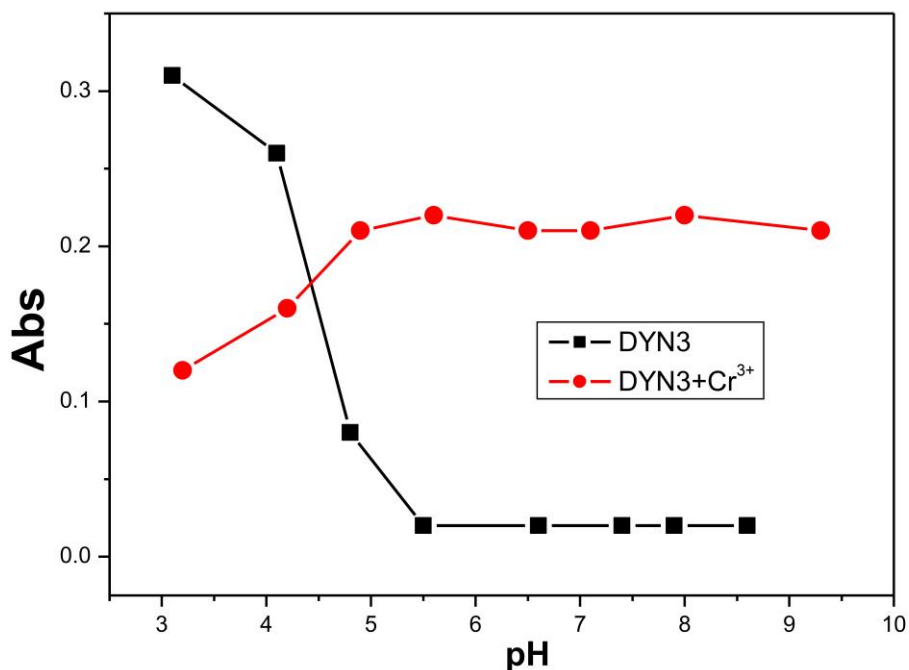

6. **Figure S6** Calculations for detection limit of **DYN3** with  $\text{Cr}^{3+}$ . The absorbance measurements were recorded at 526 nm.

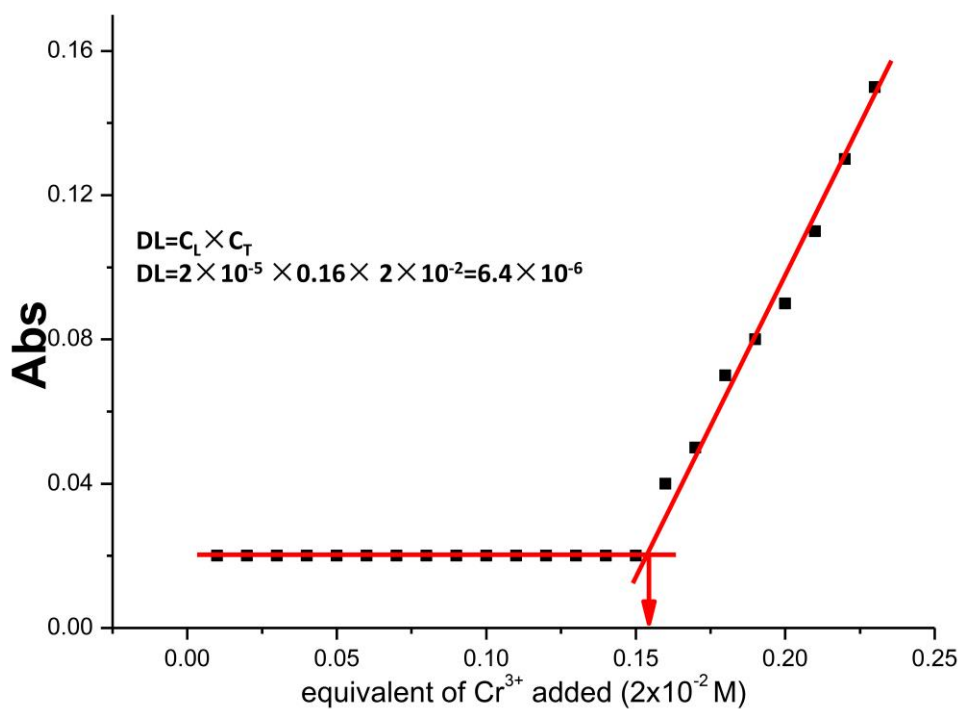

7. **Figure S7** UV-Vis spectra of **DYN2** ( $2 \times 10^{-5}$  M) in  $\text{CH}_3\text{CN}:\text{H}_2\text{O}$  (1:1, v/v, containing 0.01 M HEPES, pH=7.21) upon titration with 2.0 equiv. of perchlorate salts of metals. The red bars represent the absorbance of **DYN2** in the presence of 2 equiv. of cations of interest, respectively. The green bars represent the absorbance that occur upon the subsequent addition of 2 equiv. of  $\text{Cr}^{3+}$  to the above mentioned solutions, respectively. The absorbance measurements were recorded at 516 nm.

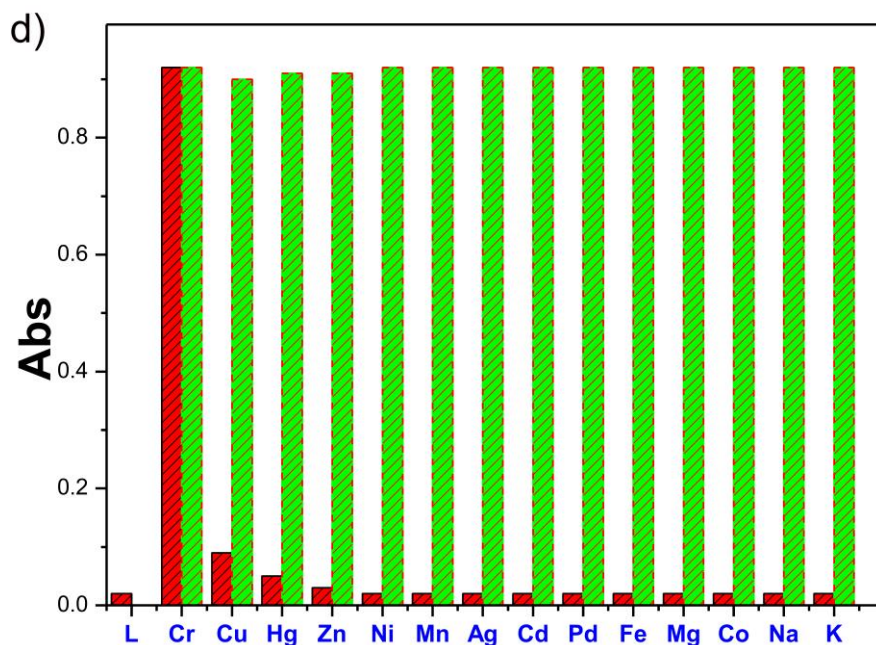

8. **Figure S8** The pH-dependent absorbance response of **DYN2** (20  $\mu\text{M}$ ) and **DYN2**+ $\text{Cr}^{3+}$  in  $\text{CH}_3\text{CN}/\text{H}_2\text{O}$  (1:1, v/v). The absorbance measurements were recorded at 516 nm.

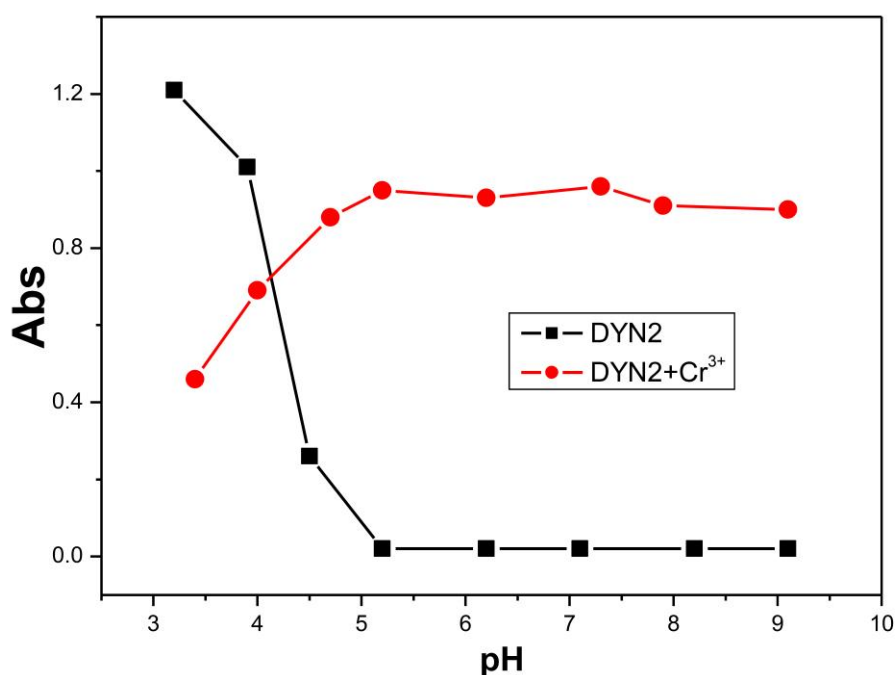

**9. Figure S9** Calculations for detection limit of **DYN2** with  $\text{Cr}^{3+}$ . The absorbance measurements were recorded at 516 nm.

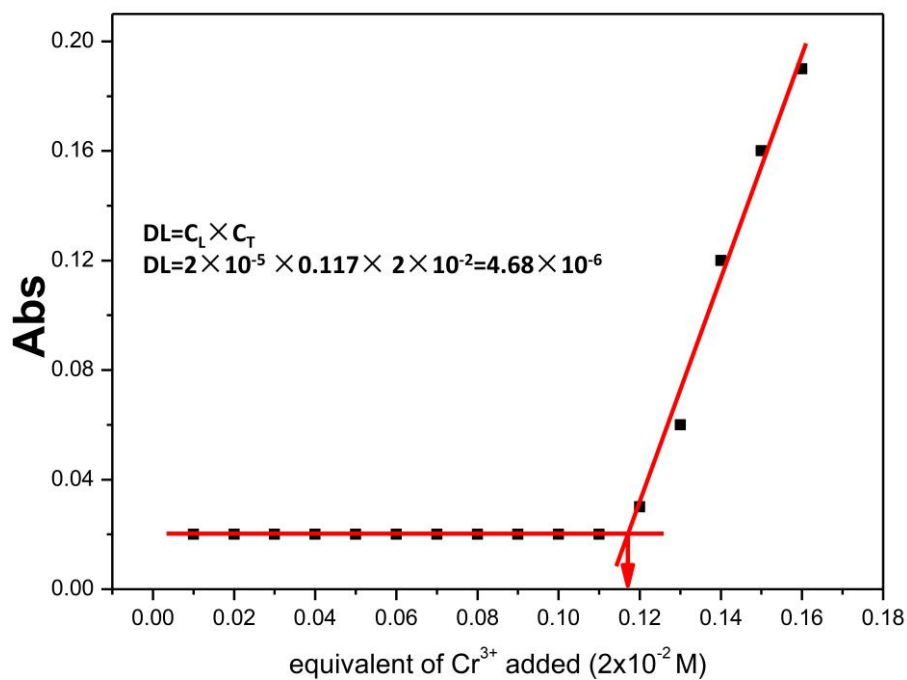

**10. Figure S10**  $^1\text{H}$ -NMR spectra of **DYN1**

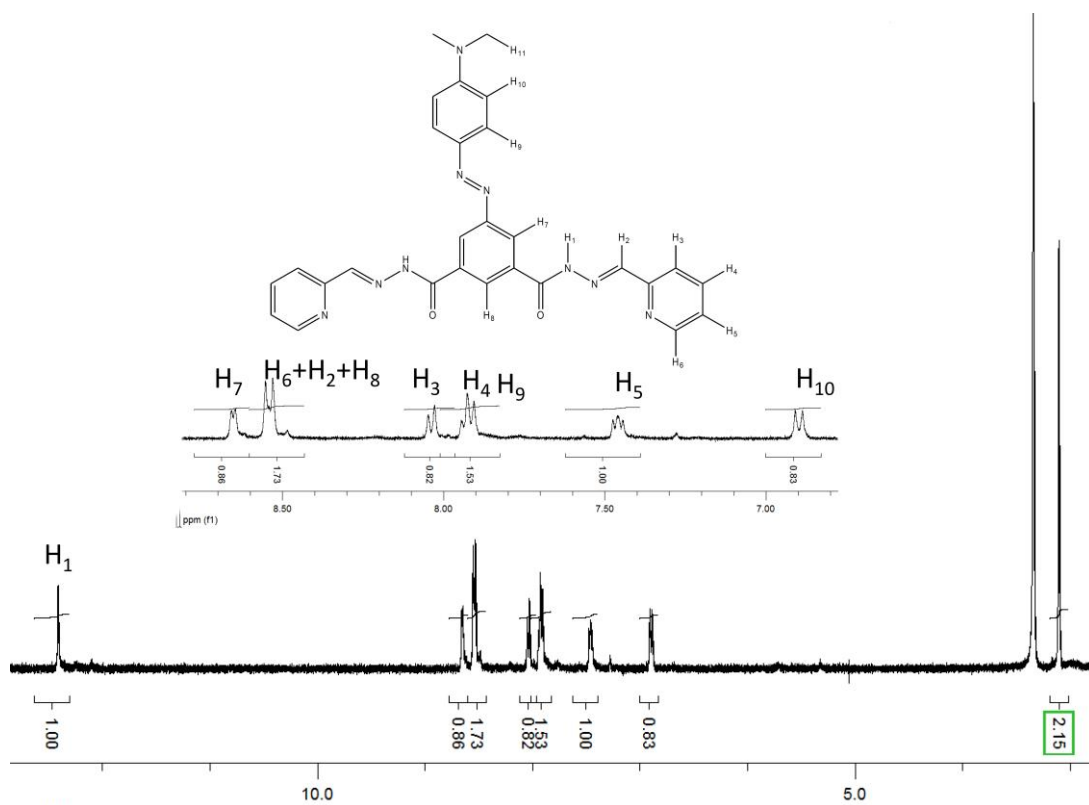

11. Figure S11  $^1\text{H-NMR}$  spectra of DYN3

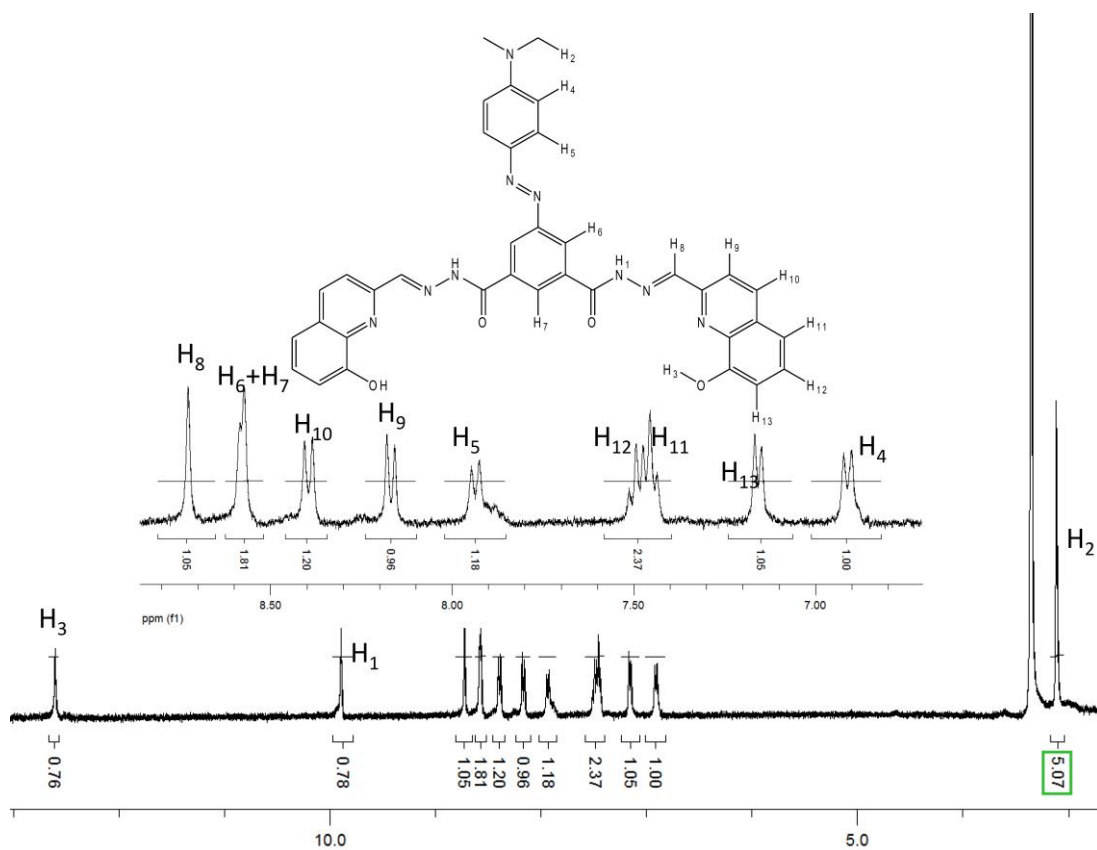

12. Figure S12  $^1\text{H-NMR}$  spectra of DYN2

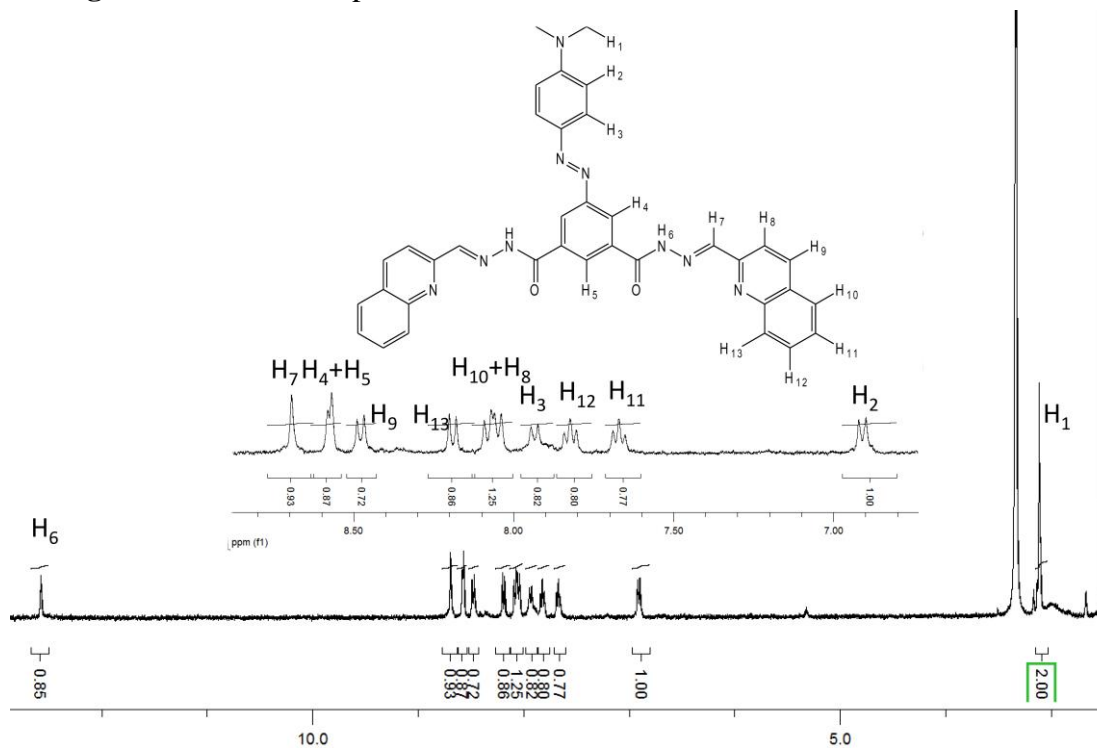

13. Figure S13 <sup>1</sup>H-NMR spectra of DYN4

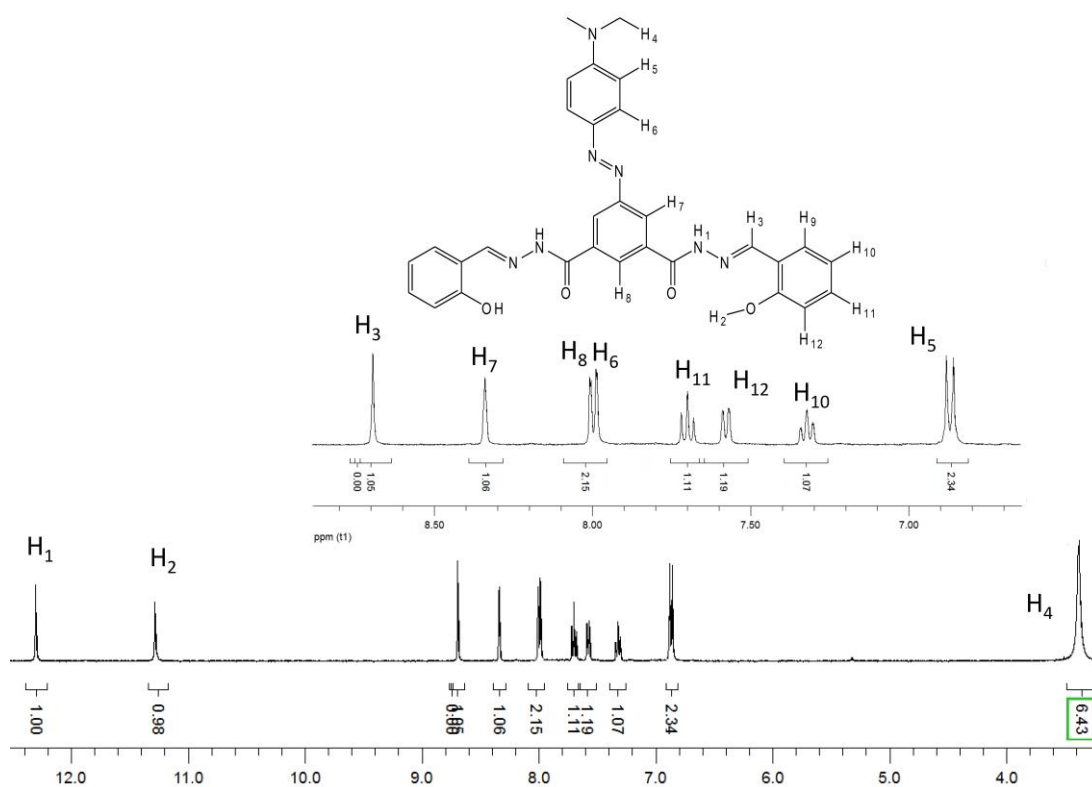

14. Figure S14 <sup>1</sup>H-NMR spectra of 1

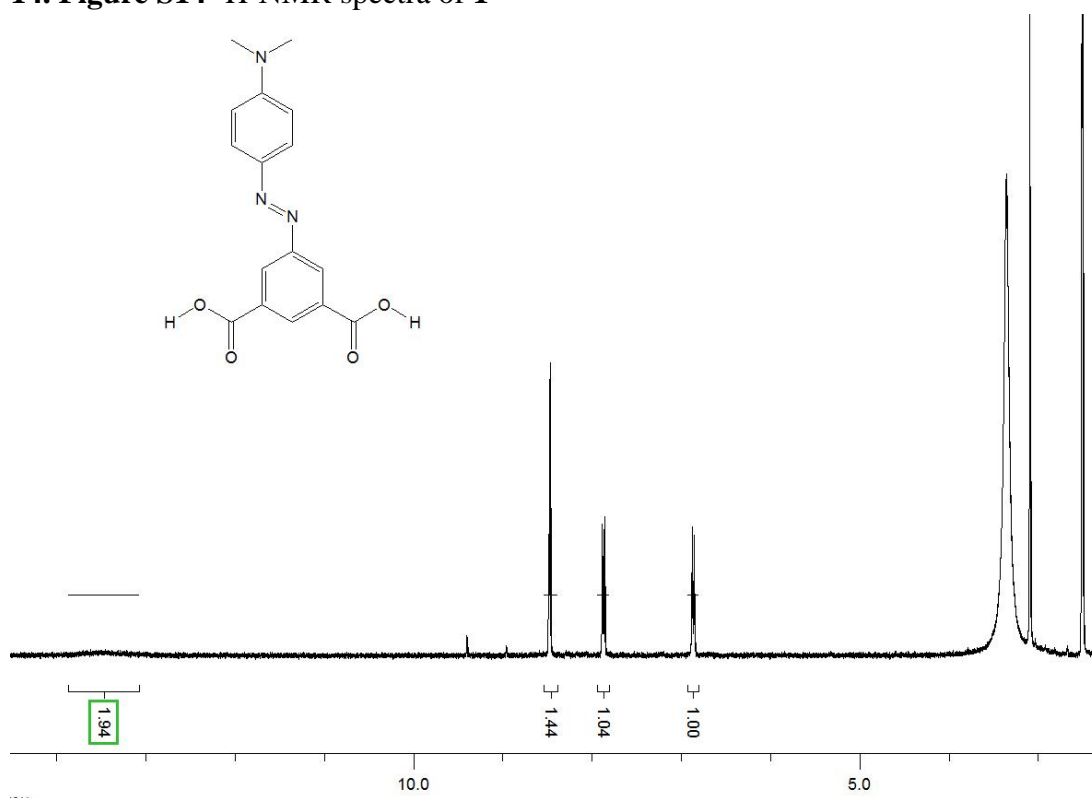



15. Figure S15  $^1\text{H-NMR}$  spectra of **2**

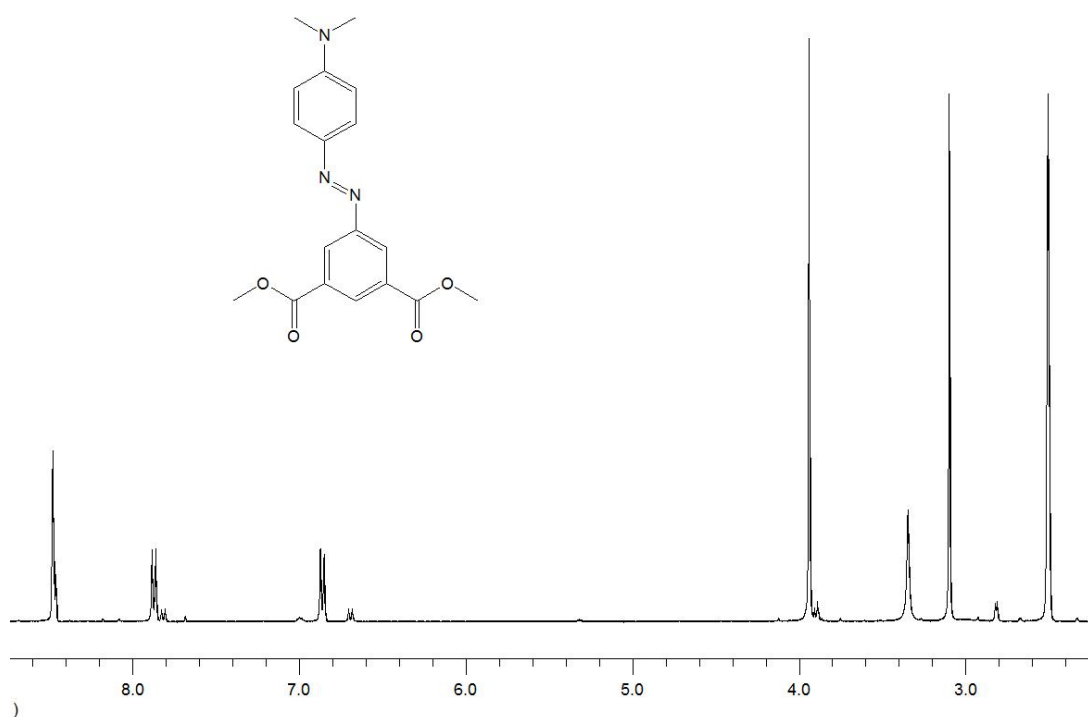

16. Figure S16  $^1\text{H-NMR}$  spectra of **3**

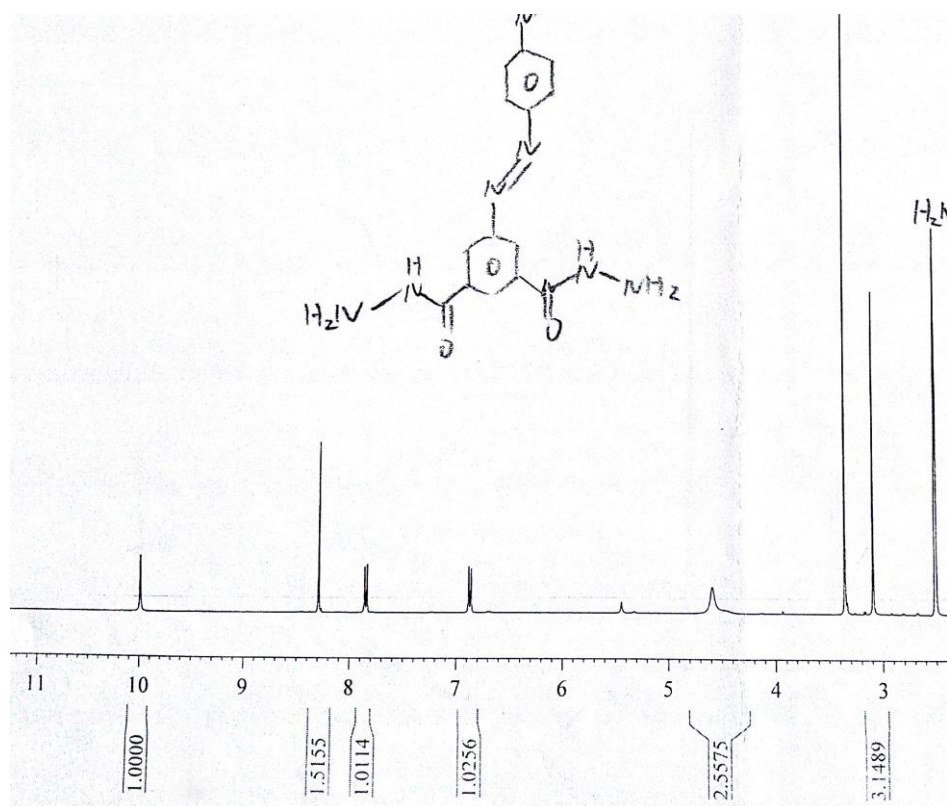

17. Figure S17 Contour plots of the HOMO and LUMO for DYN1-4

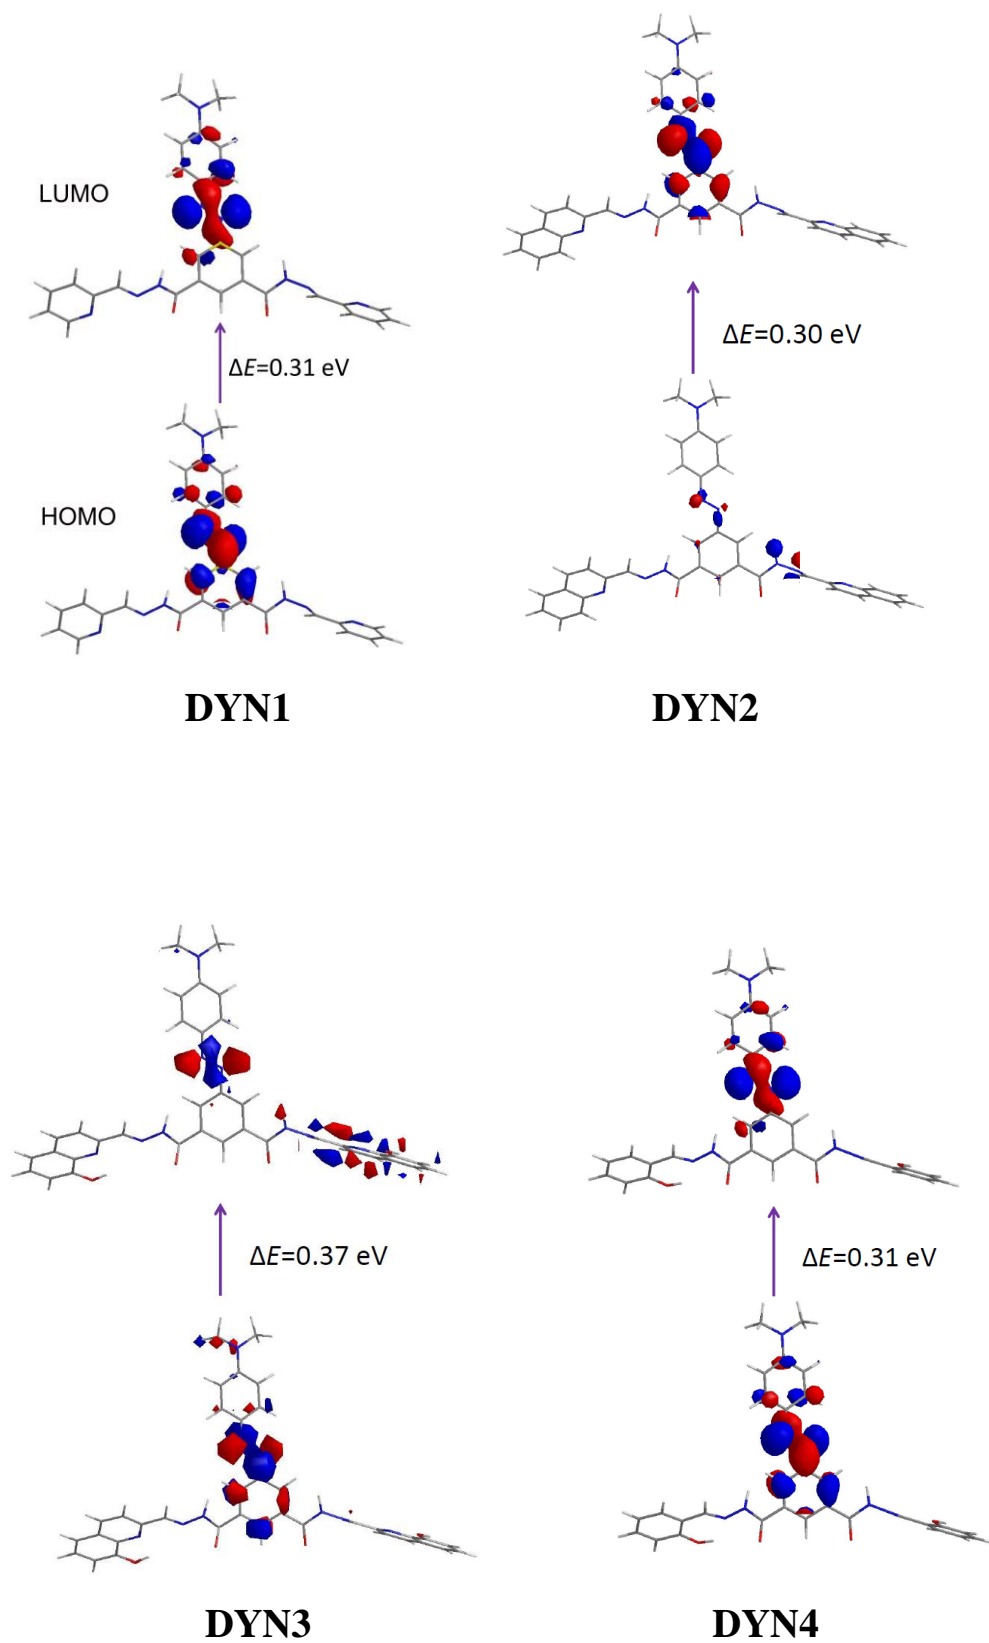

**18. Figure S18** ESI-TOF spectra of **DYN1**+Cr<sup>3+</sup>. Comparison of the experimental peak (bottom) with the simulation results obtained on the basis of natural isotopic abundances (top).

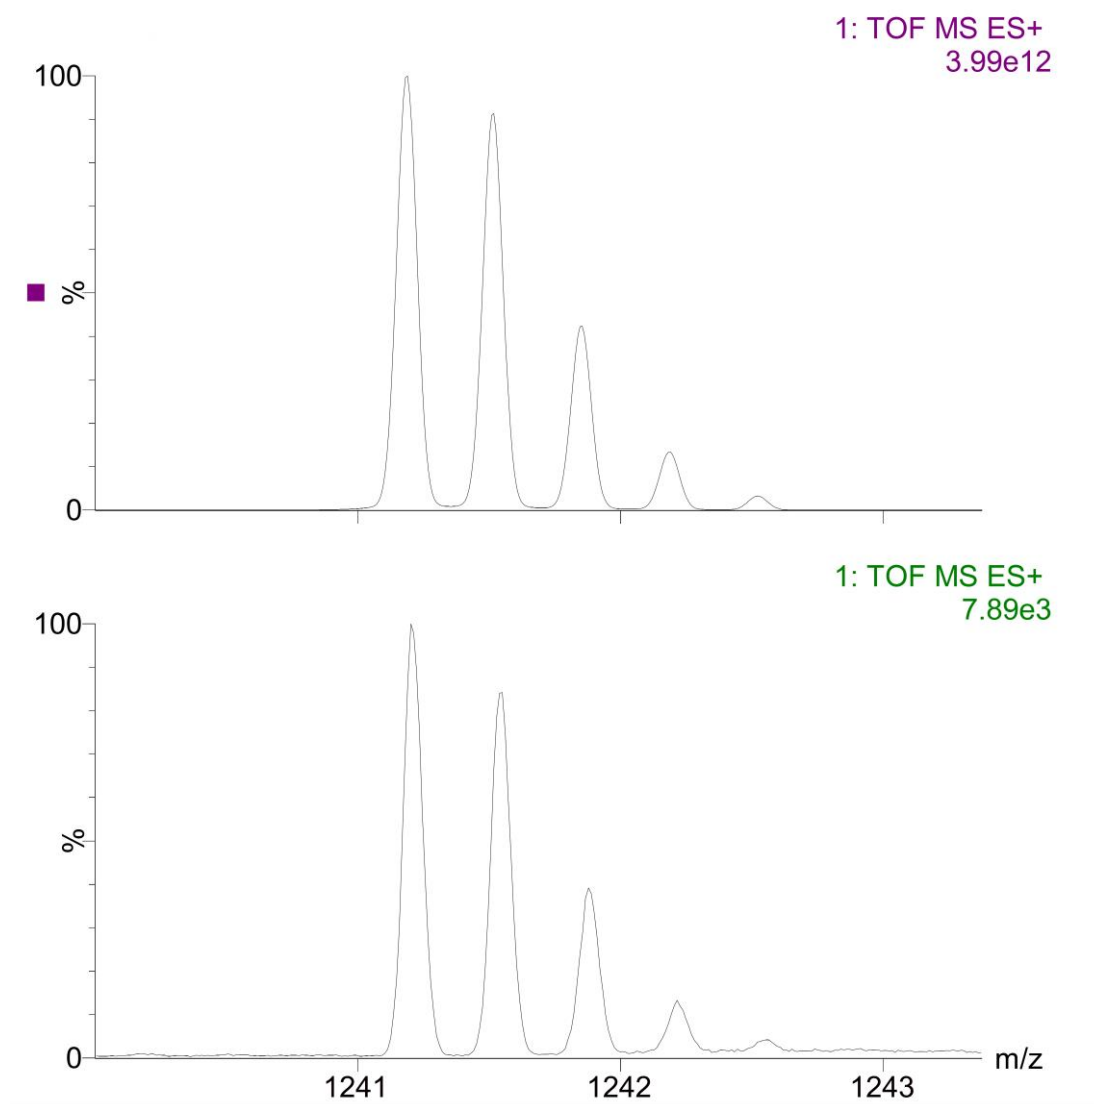

19. Figure S19 ICP-AES spectra of sewage sample (bottom). Standard working curve (top).

Cr 357.87

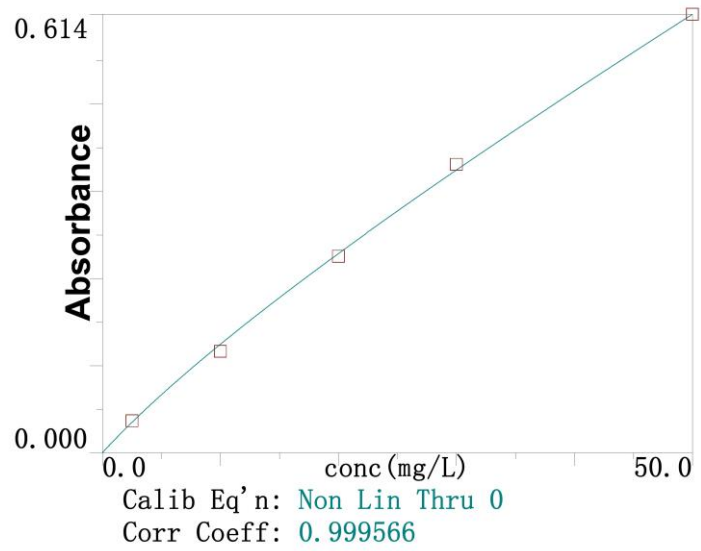

Cr 357.87

Rep: 1

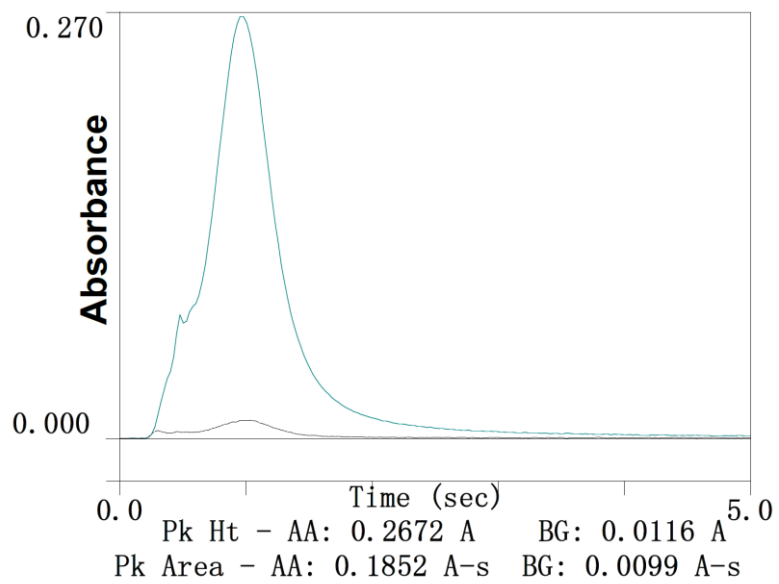

Supplement: c5ra22127g1.pdf [file c5ra22127g1.pdf]
